# Supplementary material for: Exposure Assessment of Multiple Mycotoxins and Cumulative Health Risk Assessment: A Biomonitoring-Based Study in the Yangtze River Delta, China
Source: MDPI journal article supplement (doi:10.3390/toxins13020103), 2021-02-01
Supplement: s1 [file s1]

# Supplementary Materials: Exposure Assessment of Multiple Mycotoxins and Cumulative Health Risk Assessment: A Biomonitoring-Based Study in the Yangtze River Delta, China

Qingwen Huang, Keqiu Jiang, Zhanmin Tang, Kai Fan, Jiajia Meng, Dongxia Nie, Zhihui Zhao, Yongjiang Wu and Zheng Han

## S1. Detailed UHPLC-MS/MS Method

The method for accurate determination of 23 mycotoxins/metabolites in urine samples was performed via a Waters ACQUITY UHPLC system (Milford, MA, USA) coupled with an AB SCIEX QTRA® 5500 tandem mass spectrometer (AB SCIEX instruments, Foster City, Canada). Chromatographic separation was achieved on an Agilent Poroshell 120 EC-C<sub>18</sub> column (3.0 mm × 100 mm, 2.7 μm) (Agilent, USA) with the mobile phase consisting of methanol (A) and 5 mmol/L ammonium acetate (B). A linear gradient elution program was designed as follows: initial 10% (A), 1 min 10% (A), 6 min 90% (A), 6.5 min 90% (A), 6.7 min 10% (A), and 8 min 10% (A) and held for a further 2 min for re-equilibration, yielding a total run time of 10 min. The flow rate was 0.4 mL min<sup>-1</sup>, and the injection volume was 3 μL. The column temperature and the sample temperature were maintained at 40 °C and 5 °C, respectively.

For MS/MS analysis, the electrospray ionization source was operated in both positive (ESI<sup>+</sup>) mode and negative (ESI<sup>-</sup>) mode with the parameters set as follows: ion spray voltage, 5.5 kV (positive ion mode) and 4.5 kV (negative ion mode); desolvation temperature, 500 °C; source temperature, 150 °C. Nebulizing gas and desolvation gas flow rates were 7.0 bar and 1000 L/h, respectively. Multiple reaction monitoring (MRM) mode was developed for quantification of the targeted analytes. Data processing was performed using MultiQuant 3.0.2 (Analyst; AB SCIEX, Framingham, MA, USA). The parameters and the collision energies of precursor and product ions are listed in Supplementary Table S2.

**Table S1.** The demographic characteristics of participants in the three sampling areas.

|                                        | All          | Jiangsu      | Zhejiang     | Shanghai     |
|----------------------------------------|--------------|--------------|--------------|--------------|
| Total                                  | 227          | 76           | 76           | 75           |
| Male                                   | 114          | 30           | 43           | 41           |
| Female                                 | 113          | 46           | 33           | 34           |
| Age (years)                            | 45.4 ± 17.5  | 46.5 ± 15.1  | 51.9 ± 20.3  | 37.8 ± 13.4  |
| BMI <sup>1</sup> (kg m <sup>-2</sup> ) | 23.1 ± 3.2   | 23.2 ± 3.1   | 23.1 ± 2.8   | 22.9 ± 3.6   |
| Creatinine (mg dL <sup>-1</sup> )      | 131.5 ± 64.7 | 132.6 ± 59.5 | 127.7 ± 69.2 | 134.3 ± 64.7 |

<sup>1</sup>BMI: body mass index.

**Table S2.** Co-occurrence of investigated mycotoxins and their metabolites in urine samples from Jiangsu, Zhejiang, and Shanghai.

| Table 1.                           | Distribution across location |                             |                              |                              |
|------------------------------------|------------------------------|-----------------------------|------------------------------|------------------------------|
|                                    | Total Number (prevalence)    | Jiangsu Number (prevalence) | Zhejiang Number (prevalence) | Shanghai Number (prevalence) |
| 2 Toxins                           | 30 (13.22%)                  | 11 (14.47%)                 | 6 (7.89%)                    | 13 (17.33%)                  |
| AFM1+DON-15-GlcA                   | 2 (0.88%)                    | - <sup>2</sup>              | -                            | 2 (2.67%)                    |
| OTA+DON-15-GlcA                    | 1 (0.44%)                    | -                           | -                            | -                            |
| OTA+ZEN                            | 1 (0.44%)                    | -                           | 1 (1.32%)                    | -                            |
| FB1+ZEN                            | 2 (0.88%)                    | 2 (2.63%)                   | -                            | -                            |
| FB1+DON-15-GlcA                    | 1 (0.44%)                    | -                           | 1 (1.32%)                    | -                            |
| DON+DON-15-GlcA                    | 12 (5.29%)                   | 2 (2.63%)                   | 2 (2.63%)                    | 8 (10.67%)                   |
| DON-3-GlcA+DON-15-GlcA             | 7 (3.08%)                    | 3 (3.95%)                   | 2 (2.63%)                    | 2 (2.67%)                    |
| DON-15-GlcA+ZEN                    | 4 (1.76%)                    | 4 (5.26%)                   | -                            | -                            |
| 3 Toxins                           | 13 (5.73%)                   | 5 (6.58%)                   | 3 (3.95%)                    | 5 (6.67%)                    |
| OTA+FB1+DON-15-GlcA                | 1 (0.44%)                    | -                           | -                            | 1 (1.33%)                    |
| OTA+FB1+ZEN-14-GlcA                | 1 (0.44%)                    | -                           | -                            | 1 (1.33%)                    |
| FB1+DON+DON-15-GlcA                | 1 (0.44%)                    | 1 (1.32%)                   | -                            | -                            |
| DON-3-GlcA+DON-15-GlcA+ZEN         | 2 (0.88%)                    | 2 (2.63%)                   | -                            | -                            |
| DON+DON-3-GlcA+DON-15-GlcA         | 5 (2.20%)                    | 1 (1.32%)                   | 1 (1.32%)                    | 3 (4.00%)                    |
| DON-3-GlcA+DON-15-GlcA+ZEN-14-GlcA | 1 (0.44%)                    | -                           | 1 (1.32%)                    | -                            |
| DON+DON-15-GlcA+ZEN                | 2 (0.88%)                    | 1 (1.32%)                   | 1 (1.32%)                    | -                            |
| 4 Toxins                           | 8 (3.52%)                    | 5 (6.58%)                   | 2 (2.63%)                    | 1 (1.33%)                    |
| AFM1+DON-3-GlcA+DON-15-GlcA+ZEN    | 1 (0.44%)                    | 1 (1.32%)                   | -                            | -                            |
| AFM1+FB1+DON-3-GlcA+DON-15-GlcA    | 1 (0.44%)                    | -                           | 1 (1.32%)                    | -                            |
| AFM1+FB1+DON+DON-15-GlcA           | 1 (0.44%)                    | -                           | -                            | 1 (1.33%)                    |
| FB1+DON+DON-3-GlcA+DON-15-GlcA     | 2 (0.88%)                    | 1 (1.32%)                   | 1 (1.32%)                    | -                            |
| FB1+DON+DON-15-GlcA+ZEN            | 1 (0.44%)                    | 1 (1.32%)                   | -                            | -                            |
| DON+DON-3-GlcA+DON-15-GlcA+ZEN     | 2 (0.88%)                    | 2 (2.63%)                   | 1 (1.32%)                    | -                            |
| Total                              | 110 (48.46%)                 | 43 (56.58%)                 | 31 (40.79%)                  | 36 (48.00%)                  |

<sup>1</sup> Positive samples refer to urine samples containing mycotoxins with concentrations  $\geq$  LOD.

<sup>2</sup> -, no sample.

**Table S3.** P-value of mycotoxin concentration distribution by age, sex, and BMI using the rank sum test (n = 227).

| Mycotoxins  | Age <sup>1</sup> | Sex            | BMI <sup>2</sup> |
|-------------|------------------|----------------|------------------|
| AFM1        | 0.480            | 0.564          | 0.157            |
| OTA         | 0.311            | 0.564          | 0.130            |
| FB1         | 0.916            | 0.067          | 0.598            |
| DON         | 0.712            | 0.162          | 0.375            |
| DON-3-GlcA  | 0.221            | 0.370          | 0.678            |
| DON-15-GlcA | 0.508            | 0.137          | 0.506            |
| ZEN         | 0.497            | 0.368          | 0.711            |
| ZEN-14-GlcA | 0.317            | - <sup>3</sup> | 0.317            |

<sup>1</sup>Including three age groups (20–45 years, 46–64 years and 65–88 years);

<sup>2</sup>Including three BMI categories (< 18.5, 18.5–23.9 and > 24 kg m<sup>-2</sup>).

<sup>3</sup>P-value was not calculated since only two male urine samples were contaminated by ZEN-14-GlcA.

**Table S4.** Toxicities of FB1, OTA, DON, and ZEN from EFSA data.

| Mycotoxin |      | Species    | Duration | Critical effect                                                                                                                                                                             | Dose (mg/kg bw/day)          | TDI (µg/kg bw/day) | Reference |
|-----------|------|------------|----------|---------------------------------------------------------------------------------------------------------------------------------------------------------------------------------------------|------------------------------|--------------------|-----------|
| AFB1      | Rat  | Subchronic |          | Hepatocellular carcinomas                                                                                                                                                                   | 0.0004 (BMDL <sub>10</sub> ) | -                  | [1]       |
| FB1       | Mice | Chronic    |          | Hepatotoxicity (increased incidence of megalocytic hepatocytes)                                                                                                                             | 0.1 (BMDL <sub>10</sub> )    | 1.0                | [2]       |
| OTA       | Rat  | Chronic    |          | Neoplastic effect (kidney tumors)                                                                                                                                                           | 0.0145 (BMDL <sub>10</sub> ) | -                  | [3]       |
|           | Mice | Chronic    |          | Reduced body weight gain                                                                                                                                                                    | 0.11 (BMDL <sub>05</sub> )   | 1.0                |           |
| DON       | Rat  | Subacute   |          | Estrogenic activity (increase in germ cell degeneration, sperm retention and abnormal nuclear morphology; effects on serum follicle-stimulating hormone (FSH) and luteinizing hormone (LH)) | 1 (NOAEL)                    | -                  | [4]       |
| ZEN       | Pig  | Chronic    |          | Estrogenic activity (disturbance of the estrous cycle, ovulation, conception and implantation)                                                                                              | 0.01 (NOEL)                  | 0.25               | [5]       |

Abbreviation: NOEL: no observed effect level; BMDL<sub>10</sub>: the 90<sup>th</sup> percentile benchmark dose lower confidence limit; NOAEL: no observed adverse effect level.

**Table S5.** Food consumption in the total population stratified by location.

| Food                      | 24 h consumption (g or mL) (Mean ± SD) |               |               |               | P <sup>1</sup> |
|---------------------------|----------------------------------------|---------------|---------------|---------------|----------------|
|                           | All                                    | Jiangsu       | Zhejiang      | Shanghai      |                |
| Wheat                     | 93.6 ± 103.0                           | 80.6 ± 93.8   | 93.4 ± 107.1  | 107.0 ± 107.3 | 0.119          |
| Maize                     | 8.7 ± 33.1                             | 7.9 ± 18.4    | 14.1 ± 52.2   | 4.0 ± 13.7    | 0.335          |
| Rice                      | 190.4 ± 119.4                          | 176.3 ± 106.5 | 247.0 ± 126.4 | 147.3 ± 102.3 | 0.000*         |
| Vegetables and fruit      | 179.9 ± 133.8                          | 136.5 ± 79.5  | 206.6 ± 135.3 | 196.7 ± 163.6 | 0.015*         |
| Meat                      | 107.2 ± 92.9                           | 109.2 ± 95.5  | 103.3 ± 101.3 | 109.0 ± 81.9  | 0.499          |
| Nuts and seeds            | 24.4 ± 31.9                            | 19.7 ± 24.6   | 29.6 ± 34.6   | 24.0 ± 35.0   | 0.189          |
| Milk and dairy produce    | 47.1 ± 89.8                            | 35.2 ± 80.0   | 49.3 ± 102.2  | 57.0 ± 85.6   | 0.022*         |
| Beverages, coffee and tea | 155.6 ± 213.6                          | 249.0 ± 241.5 | 81.2 ± 166.5  | 136.3 ± 192.8 | 0.000*         |

<sup>1</sup>The *p*-value was calculated using the Kruskal–Wallis test, \**p* < 0.05.

**Table S6.** LC-MS/MS parameters for the detection of targeted mycotoxins.

| Target        | Molecular ion      | Precursor ion (m/z) | Quantification ion (m/z) | CE <sup>1</sup> (Q) (eV) | Qualitative ion (m/z) | CE (q) (eV) | LOQ <sup>2</sup> (ng mL <sup>-1</sup> ) | LOD <sup>3</sup> (ng mL <sup>-1</sup> ) |
|---------------|--------------------|---------------------|--------------------------|--------------------------|-----------------------|-------------|-----------------------------------------|-----------------------------------------|
| AFB1          | [M+H] <sup>+</sup> | 313                 | 241                      | 50                       | 269                   | 43          | 0.2                                     | 0.05                                    |
| AFB2          | [M+H] <sup>+</sup> | 315                 | 259                      | 38                       | 287                   | 34          | 0.5                                     | 0.2                                     |
| AFG1          | [M+H] <sup>+</sup> | 329                 | 243                      | 35                       | 311                   | 38          | 0.2                                     | 0.05                                    |
| AFG2          | [M+H] <sup>+</sup> | 331                 | 245                      | 40                       | 285                   | 37          | 0.5                                     | 0.2                                     |
| AFM1          | [M+H] <sup>+</sup> | 329                 | 273                      | 31                       | 259                   | 30          | 0.2                                     | 0.05                                    |
| AFM2          | [M+H] <sup>+</sup> | 331                 | 189                      | 54                       | 216                   | 48          | 0.2                                     | 0.05                                    |
| OTA           | [M+H] <sup>+</sup> | 404                 | 239                      | 34                       | 221                   | 22          | 0.1                                     | 0.05                                    |
| OT $\alpha$   | [M+H] <sup>+</sup> | 257                 | 102                      | 40                       | 221                   | 22          | 0.1                                     | 0.05                                    |
| FB1           | [M+H] <sup>+</sup> | 722                 | 334                      | 50                       | 352                   | 50          | 0.2                                     | 0.1                                     |
| DON           | [M+H] <sup>+</sup> | 297                 | 203                      | 28                       | 175                   | 28          | 1                                       | 0.5                                     |
| DON-3-GlcA    | [M-H] <sup>-</sup> | 471                 | 175                      | 40                       | 265                   | 36          | 1                                       | 0.5                                     |
| 3-ADON        | [M+H] <sup>+</sup> | 339                 | 231                      | 12                       | 137                   | 15          | 5                                       | 2                                       |
| 15-ADON       | [M+H] <sup>+</sup> | 339                 | 261                      | 12                       | 279                   | 10          | 5                                       | 2                                       |
| T-2           | [M+H] <sup>+</sup> | 484                 | 305                      | 14                       | 185                   | 18          | 0.3                                     | 0.1                                     |
| HT-2          | [M+H] <sup>+</sup> | 442                 | 263                      | 10                       | 215                   | 10          | 1                                       | 0.5                                     |
| FUS-X         | [M+H] <sup>+</sup> | 355                 | 229                      | 15                       | 247                   | 13          | 10                                      | 4                                       |
| ZEN           | [M-H] <sup>-</sup> | 317                 | 175                      | 35                       | 131                   | 40          | 0.2                                     | 0.1                                     |
| ZEN-14-GlcA   | [M-H] <sup>-</sup> | 493                 | 317                      | 40                       | 175                   | 40          | 0.5                                     | 0.2                                     |
| $\alpha$ -ZEL | [M-H] <sup>-</sup> | 319                 | 174                      | 38                       | 130                   | 45          | 0.5                                     | 0.2                                     |
| $\beta$ -ZEL  | [M-H] <sup>-</sup> | 319                 | 174                      | 38                       | 130                   | 45          | 0.5                                     | 0.2                                     |
| $\alpha$ -ZAL | [M-H] <sup>-</sup> | 321                 | 277                      | 31                       | 161                   | 40          | 0.5                                     | 0.2                                     |
| $\beta$ -ZAL  | [M-H] <sup>-</sup> | 321                 | 277                      | 31                       | 161                   | 40          | 0.5                                     | 0.2                                     |

<sup>1</sup>Collision energies (CE) (eV) required for optimal signal strength.

<sup>2</sup>LOD (limit of detection).

<sup>3</sup>LOQ (limit of quantification).

## References

1. European Food Safety Authority (EFSA). Risk assessment of aflatoxins in food. *EFSA J.* **2020** *18*(3), 6040. <https://doi.org/10.2903/j.efsa.2020.6040>.
2. European Food Safety Authority (EFSA). Appropriateness to set a group health-based guidance value for fumonisins and their modified forms. *EFSA J.* **2018**, *16*(2):5172. <https://doi.org/10.2903/j.efsa.2018.5172>.
3. European Food Safety Authority (EFSA). Risk assessment of ochratoxin A in food. *EFSA J.* **2020**, *18*(5), 6113. <https://doi.org/10.2903/j.efsa.2020.6113>.
4. European Food Safety Authority (EFSA). Risks to human and animal health related to the presence of deoxynivalenol and its acetylated and modified forms in food and feed. *EFSA J.* **2017**, *15*(9):4718. <https://doi.org/10.2903/j.efsa.2017.4718>.
5. European Food Safety Authority (EFSA). Scientific opinion on the risks for public health related to the presence of zearalenone in food. *EFSA J.* **2011**, *9*(6), 2197. <https://doi.org/10.2903/j.efsa.2011.2197>.
